# Supplementary material for: Identification of FGF19 as a prognostic marker and potential driver gene of lung squamous cell carcinomas in Chinese smoking patients
Source: PubMed Central journal article supplement (PMC4951296; doi:10.18632/oncotarget.7817), 2016-03-01
Supplement: oncotarget-07-18394-s001.pdf [file oncotarget-07-18394-s001.pdf]

# Identification of FGF19 as a prognostic marker and potential driver gene of lung squamous cell carcinomas in Chinese smoking patients

## Supplementary Materials

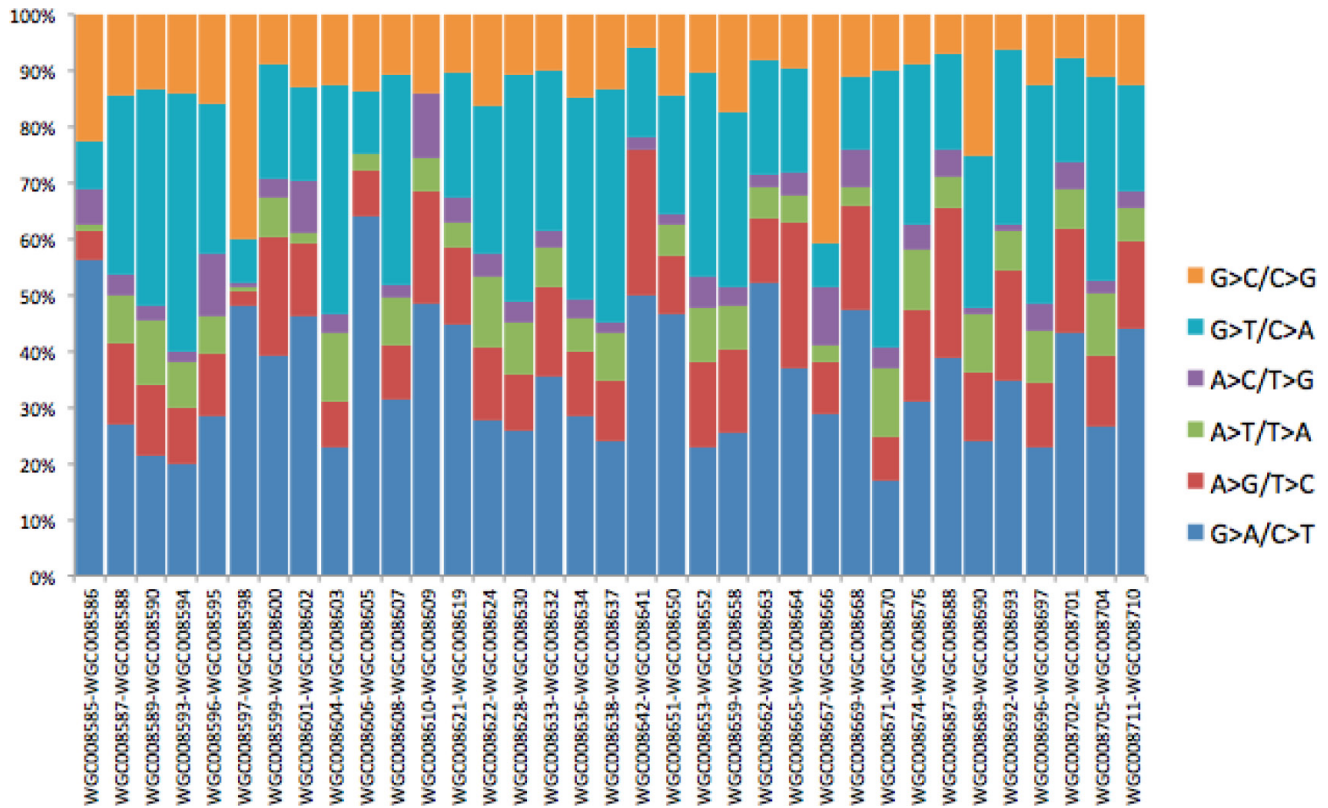

Supplementary Figure S1: The mutation spectrum of six transition (Ti) and transversion (Tv) categories for each patient with point mutations frequency > 20 were shown.

| #CHROM | Start    | End      | REF | ALT | QUAL   | Gene location | Gene |
|--------|----------|----------|-----|-----|--------|---------------|------|
| chr6   | 70092744 | 70092744 | A   | T   | 854.19 | exonic        | BAI3 |

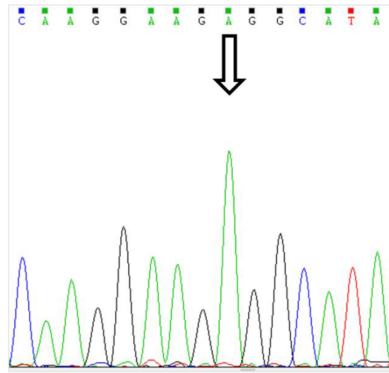

WGC008665: Normal allele\_freq 0.00%

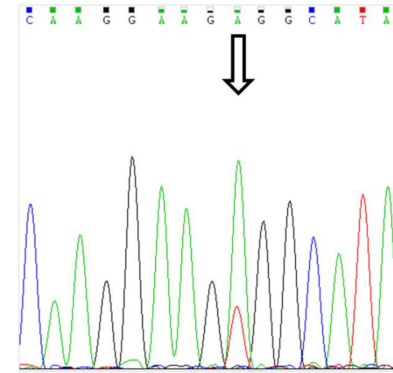

WGC008664: Tumor allele\_freq 35.96%

| #CHROM | Start    | End      | REF | ALT | QUAL    | Gene location | Gene |
|--------|----------|----------|-----|-----|---------|---------------|------|
| chr6   | 69646524 | 69646524 | G   | A   | 1850.19 | exonic        | BAI3 |

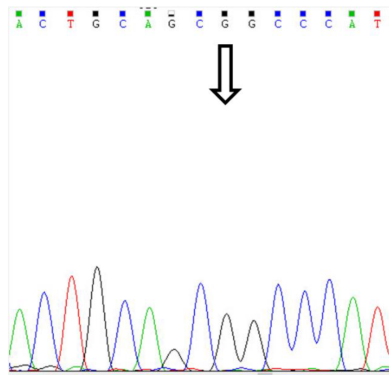

WGC008659: Normal allele\_freq 0.00%

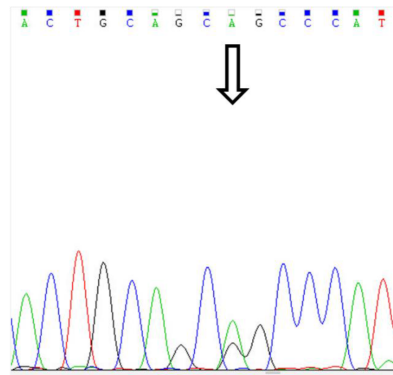

WGC008658: Tumor allele\_freq 56.00%

| #CHROM | Start    | End      | REF | ALT | QUAL    | Gene location | Gene     |
|--------|----------|----------|-----|-----|---------|---------------|----------|
| chr18  | 14852064 | 14852064 | G   | A   | 1739.19 | exonic        | ANKRD30B |

7

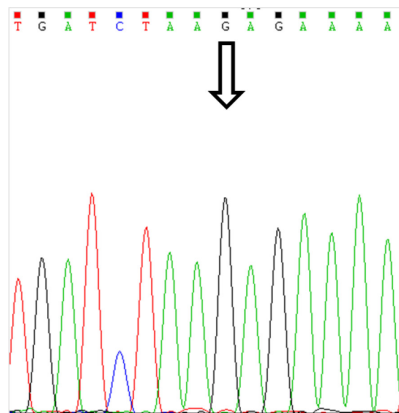

WGC008659: Normal allele\_freq 0.00%

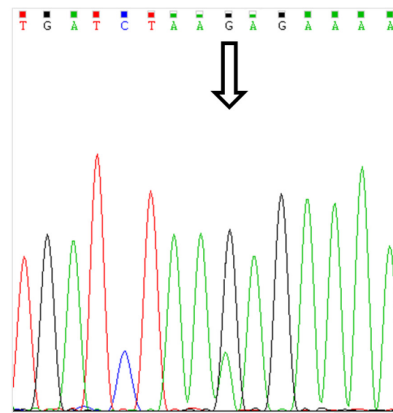

WGC008658: Tumor allele\_freq 38.66%

**Supplementary Figure S2: Verification of point mutations on designated genes in selected samples.** Region spanning the SNP on various genes were amplified by PCR and subjected to sequencing. The tumor allele frequency was determined by comparing the area of altered nucleotide vs. the original one in the chromatogram.

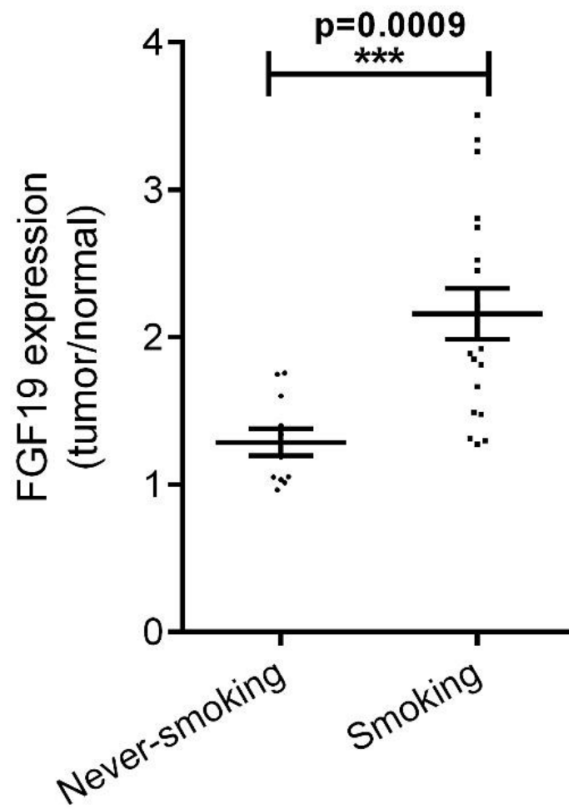

Supplementary Figure S3: Additional validation without those samples with very high FGF19 amplifications of SQS and SQNS patients was analyzed (one-way ANOVA, \*\*\* $p = 0.0009$ ).

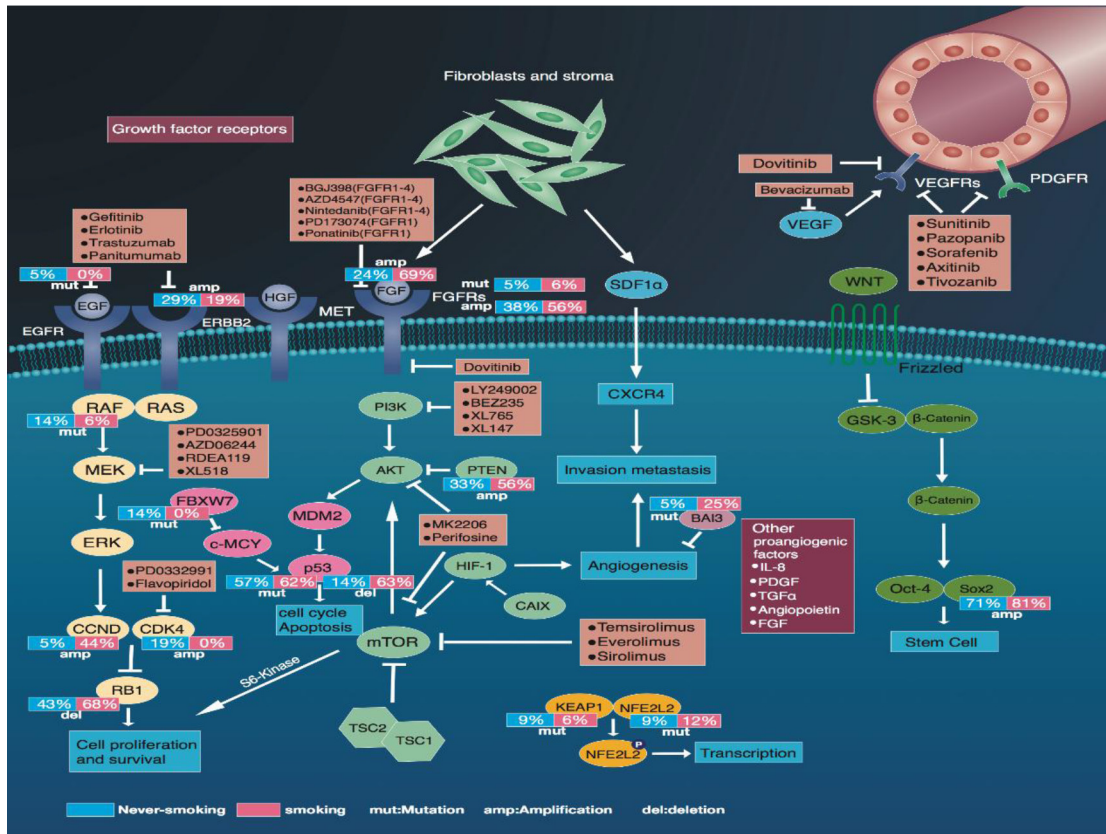

**Supplementary Figure S4: Somatically altered pathways in LSCC of smoking and never-smoking patients.** Genes are shown along with the percentage of samples with alterations, including gene amplification, mutation and deletion.

**Supplementary Table S1: Patient information on smoking status and history, as well as other risk factors**

| Patient ID | General information |     |                                          | Smoking Information           |                | Age when starting to smoke | Time of exposure to tobacco | Number of cigarettes/day | Strength to inhale the cigarette | Type of smoke   |
|------------|---------------------|-----|------------------------------------------|-------------------------------|----------------|----------------------------|-----------------------------|--------------------------|----------------------------------|-----------------|
|            | Gender              | Age | Other risks factors                      | Family history of lung cancer | Smoking status |                            |                             |                          |                                  |                 |
| WGC008585  | female              | 58  | N/A                                      | no                            | no             | N/A                        | 0                           | 0                        | 0                                | N/A             |
| WGC008587  | male                | 61  | N/A                                      | no                            | no             | N/A                        | 0                           | 0                        | 0                                | N/A             |
| WGC008589  | male                | 63  | N/A                                      | no                            | no             | N/A                        | 0                           | 0                        | 0                                | N/A             |
| WGC008593  | male                | 56  | N/A                                      | no                            | no             | N/A                        | 0                           | 0                        | 0                                | N/A             |
| WGC008595  | female              | 51  | N/A                                      | no                            | no             | N/A                        | 0                           | 0                        | 0                                | N/A             |
| WGC008597  | female              | 52  | right bronchiectasis                     | no                            | no             | N/A                        | 0                           | 0                        | 0                                | N/A             |
| WGC008599  | male                | 60  | N/A                                      | no                            | no             | N/A                        | 0                           | 0                        | 0                                | N/A             |
| WGC008601  | female              | 54  | N/A                                      | no                            | no             | N/A                        | 0                           | 0                        | 0                                | N/A             |
| WGC008603  | male                | 74  | N/A                                      | no                            | no             | N/A                        | 0                           | 0                        | 0                                | N/A             |
| WGC008605  | male                | 61  | N/A                                      | no                            | no             | N/A                        | 0                           | 0                        | 0                                | N/A             |
| WGC008607  | male                | 72  | N/A                                      | no                            | no             | N/A                        | 0                           | 0                        | 0                                | N/A             |
| WGC008609  | male                | 71  | N/A                                      | no                            | no             | N/A                        | 0                           | 0                        | 0                                | N/A             |
| WGC008615  | female              | 40  | Mitral valve replacement surgery in 2000 | no                            | no             | N/A                        | 0                           | 0                        | 0                                | N/A             |
| WGC008619  | male                | 58  | N/A                                      | no                            | no             | N/A                        | 0                           | 0                        | 0                                | N/A             |
| WGC008622  | male                | 53  | N/A                                      | no                            | no             | N/A                        | 0                           | 0                        | 0                                | N/A             |
| WGC008628  | male                | 58  | N/A                                      | no                            | no             | N/A                        | 0                           | 0                        | 0                                | N/A             |
| WGC008632  | male                | 66  | N/A                                      | no                            | no             | N/A                        | 0                           | 0                        | 0                                | N/A             |
| WGC008634  | male                | 60  | N/A                                      | no                            | no             | N/A                        | 0                           | 0                        | 0                                | N/A             |
| WGC008637  | male                | 66  | N/A                                      | no                            | no             | N/A                        | 0                           | 0                        | 0                                | N/A             |
| WGC008641  | male                | 76  | N/A                                      | no                            | no             | N/A                        | 0                           | 0                        | 0                                | N/A             |
| WGC008650  | male                | 65  | N/A                                      | no                            | no             | N/A                        | 0                           | 0                        | 0                                | N/A             |
| WGC008652  | male                | 54  | N/A                                      | no                            | yes            | 24                         | 30                          | 40                       | 1200                             | straw cigarette |
| WGC008658  | male                | 62  | N/A                                      | no                            | yes            | 22                         | 40                          | 60                       | 2400                             | straw cigarette |
| WGC008662  | male                | 67  | N/A                                      | no                            | yes            | 18                         | 50                          | 20                       | 1000                             | straw cigarette |
| WGC008664  | male                | 63  | N/A                                      | no                            | yes            | 23                         | 40                          | 40                       | 1600                             | straw cigarette |
| WGC008666  | male                | 66  | high blood pressure for 20 years         | no                            | yes            | 17                         | 50                          | 40                       | 2000                             | straw cigarette |
| WGC008668  | male                | 56  | in 2006, diagnosed with meningioma       | no                            | yes            | 25                         | 30                          | 60                       | 1800                             | straw cigarette |
| WGC008670  | male                | 65  | diabetes mellitus type II                | no                            | yes            | 30                         | 35                          | 40                       | 1400                             | straw cigarette |
| WGC008674  | male                | 68  | N/A                                      | no                            | yes            | 28                         | 40                          | 25                       | 1000                             | straw cigarette |

|           |      |    |                            |    |     |    |    |    |      |                    |
|-----------|------|----|----------------------------|----|-----|----|----|----|------|--------------------|
| WGC008687 | male | 59 | cholecystectomy<br>in 2006 | no | yes | 29 | 30 | 40 | 1200 | straw<br>cigarette |
| WGC008689 | male | 60 | high blood<br>pressure     | no | yes | 20 | 40 | 40 | 1600 | straw<br>cigarette |
| WGC008692 | male | 74 | N/A                        | no | yes | 20 | 60 | 20 | 1200 | straw<br>cigarette |
| WGC008696 | male | 73 | bronchiectasis             | no | yes | 23 | 50 | 20 | 1000 | straw<br>cigarette |
| WGC008701 | male | 69 | N/A                        | no | yes | 25 | 30 | 40 | 1200 | straw<br>cigarette |
| WGC008704 | male | 70 | N/A                        | no | yes | 25 | 40 | 30 | 1200 | straw<br>cigarette |
| WGC008710 | male | 60 | N/A                        | no | yes | 27 | 30 | 40 | 1200 | straw<br>cigarette |

**Supplementary Table S2: Comparing mutation genes identified in our cohort with published data**

| Genetic abnormality | Gene location     | TCGA <sup>(Ref.7)</sup> | Korean <sup>(Ref.9)</sup> | Our study |
|---------------------|-------------------|-------------------------|---------------------------|-----------|
| TP53 mut.           | 17p13.1           | 80.33%                  | 73%                       | 62.2%     |
| PI3K3CA amp.        | 3q26.3            | 32.58%                  | 77%                       | 70.3%     |
| SOX2 amp.           | 3q26.3-q27        | 34.26%                  | 79%                       | 75.7%     |
| FGFR1 amp.          | 8p12              | 15.17%                  | 31%                       | 43.2%     |
| PTEN mut.           | 10q23.3           | 7.86%                   | 11%                       | 5.41%     |
| MET amp.            | 7q31.1            |                         |                           | 8.11%     |
| PTEN loss           | 10q23.3           | 6.18%                   | 31%                       | 37.8%     |
| KRAS mut.           | 12p12.1           | 1.12%                   |                           | 0.00%     |
| LKB1 mut.           | 19p13.3           |                         |                           | 2.70%     |
| DDR2 mut.           | 1q23.3            |                         |                           | 5.41%     |
| HER2 overexp.       | 17q11.2-q12;17q21 |                         | 14%                       | 27.03%    |
| PI3K3CA mut.        | 3q26.3            | 16%                     | 9%                        | 8.11      |
| BRAF mut.           | 7p34              | 4.49%                   |                           | 2.70%     |
| EGFR mut.           | 7p12              | 3.93%                   | 2%                        | 2.70%     |
| AKT1 mut.           | 14q32.32          | 1.12%                   |                           | 0.00%     |
| MET mut.            | 7q31.1            |                         |                           | 2.70%     |
| HER2 mut.           | 17q11.2-q12;17q21 | 3.37%                   |                           | 0.00%     |

Amplification, amp.; mutation, mut.; overexpression, overexp.

**Supplementary Table S3: Mutation genes identified in both smokers and never-smokers**

| Mutation type    | Never-smoking% | Smoking% | Pathway                  |
|------------------|----------------|----------|--------------------------|
| TP53             | 57.14%         | 62.50%   | Cell Cycle/Apoptosis     |
| TTN              | 57.14%         | 56.25%   | other                    |
| CSMD3            | 23.81%         | 43.75%   | other                    |
| DNAH5            | 14.29%         | 25.00%   | other                    |
| CCDC168          | 9.52%          | 25.00%   | other                    |
| USH2A            | 9.52%          | 25.00%   | differentiation          |
| SYNE1            | 14.29%         | 25.00%   | Cell Cycle               |
| LRP1B            | 23.81%         | 18.75%   | transport                |
| ZFH4             | 19.05%         | 18.75%   | Transcription regulation |
| OBSCN            | 23.81%         | 18.75%   | RhoA Pathway             |
| PKHD1L1          | 19.05%         | 18.75%   | immune response          |
| ARID1A           | 9.52%          | 12.50%   | Chromatin Modification   |
| NFE2L2           | 9.52%          | 12.50%   | Cell Cycle/Apoptosis     |
| DDR2             | 4.76%          | 6.25%    | RTK signaling            |
| KEAP1            | 9.52%          | 6.25%    | Proteolysis              |
| PIK3CA(mutation) | 9.52%          | 6.25%    | PI3K signaling           |
| CDKN2A           | 4.76%          | 6.25%    | Cell Cycle/Apoptosis     |
| MLL2             | 9.52%          | 6.25%    | Methyltransferase        |
| SETD2            | 4.76%          | 6.25%    | Methyltransferase        |

**Supplementary Table S4: Mutation genes identified only in smokers**

| Gene     | Never-smoking% | Smoking% | Pathway                  |
|----------|----------------|----------|--------------------------|
| COL3A1   | 0.00%          | 25.00%   | RhoA Pathway             |
| BAI3     | 0.00%          | 25.00%   | angiogenesis             |
| ZNF729   | 0.00%          | 18.75%   | Transcription regulation |
| ZNF479   | 0.00%          | 18.75%   | Transcription regulation |
| ZNF251   | 0.00%          | 18.75%   | Transcription regulation |
| TBX22    | 0.00%          | 18.75%   | Transcription regulation |
| STARD13  | 0.00%          | 18.75%   | RhoA Pathway             |
| SSFA2    | 0.00%          | 18.75%   | other                    |
| SPHKAP   | 0.00%          | 18.75%   | cAMP signal pathway      |
| RIMS2    | 0.00%          | 18.75%   | cAMP signal pathway      |
| FHL5     | 0.00%          | 18.75%   | Transcription regulation |
| DNAJC13  | 0.00%          | 18.75%   | other                    |
| DCC      | 0.00%          | 18.75%   | Apoptosis                |
| CTNNA2   | 0.00%          | 18.75%   | adhesion                 |
| C1orf168 | 0.00%          | 18.75%   | other                    |
| ANKRD30B | 0.00%          | 18.75%   | other                    |

**Supplementary Table S5: Mutation genes identified only in never-smokers**

| Gene      | Never-smoking% | Smoking% | pathway                                      |
|-----------|----------------|----------|----------------------------------------------|
| MUC17     | 23.81%         | 0.00%    | O-linked glycosylation of mucins             |
| RXFP2     | 19.05%         | 0.00%    | cAMP signal pathway                          |
| DOCK10    | 19.05%         | 0.00%    | RhoA Pathway                                 |
| AHNAK2    | 19.05%         | 0.00%    | other                                        |
| UNC13A    | 14.29%         | 0.00%    | synaptic vesicle maturation                  |
| TNRC18    | 14.29%         | 0.00%    | Transcription regulation                     |
| SPATA31D1 | 14.29%         | 0.00%    | differentiation                              |
| SLITRK5   | 14.29%         | 0.00%    | synaptic transmission                        |
| SCN10A    | 14.29%         | 0.00%    | cell communication                           |
| PRB2      | 14.29%         | 0.00%    | other                                        |
| LPHN3     | 14.29%         | 0.00%    | neuropeptide signaling pathway               |
| IFI44L    | 14.29%         | 0.00%    | immune response                              |
| GRK7      | 14.29%         | 0.00%    | Chemokine Signaling                          |
| FBXW7     | 14.29%         | 0.00%    | negative regulation of DNA endoreduplication |
| DAGLB     | 14.29%         | 0.00%    | neuroblast proliferation                     |
| CUX2      | 14.29%         | 0.00%    | Transcription regulation                     |
| CACNA1F   | 14.29%         | 0.00%    | PKC-Theta Pathway                            |
| C5orf42   | 14.29%         | 0.00%    | other                                        |
| ADAM21    | 14.29%         | 0.00%    | spermatogenesis                              |
| ADAM18    | 14.29%         | 0.00%    | spermatogenesis                              |
| ABCG2     | 14.29%         | 0.00%    | ATP catabolic process                        |
